# Supplementary material
Source: publisher figshare collection journal article supplement (https://acs.figshare.com/ndownloader/files/7580287)
Supplement: Supplementary file 1 [file 7580287]

# Ultrathin LiCoO<sub>2</sub> Nanosheets: An Efficient Water-Oxidation Catalyst

Jianghao Wang,<sup>a</sup> Liping Li,<sup>b</sup> Haiquan Tian,<sup>a</sup> Yuelan Zhang,<sup>b</sup> Xiangli Che,<sup>a</sup> Guangshe Li<sup>\*a, b</sup>

[a] J. Wang, H. Tian, X. Che, Dr. G. Li

Fujian Institute of Research on the Structure of Matter University of Chinese Academy of Sciences

Fuzhou 350002, P. R. China

[b] Dr. G. Li, Dr. L. Li, Y. Zhang

State Key Laboratory of Inorganic Synthesis & Preparative Chemistry, College of Chemistry, Jilin University

Changchun 130012, P. R. China

E-mail: [Guangshe@fjirsm.ac.cn](mailto:Guangshe@fjirsm.ac.cn); [guangshe@jlu.edu.cn](mailto:guangshe@jlu.edu.cn)

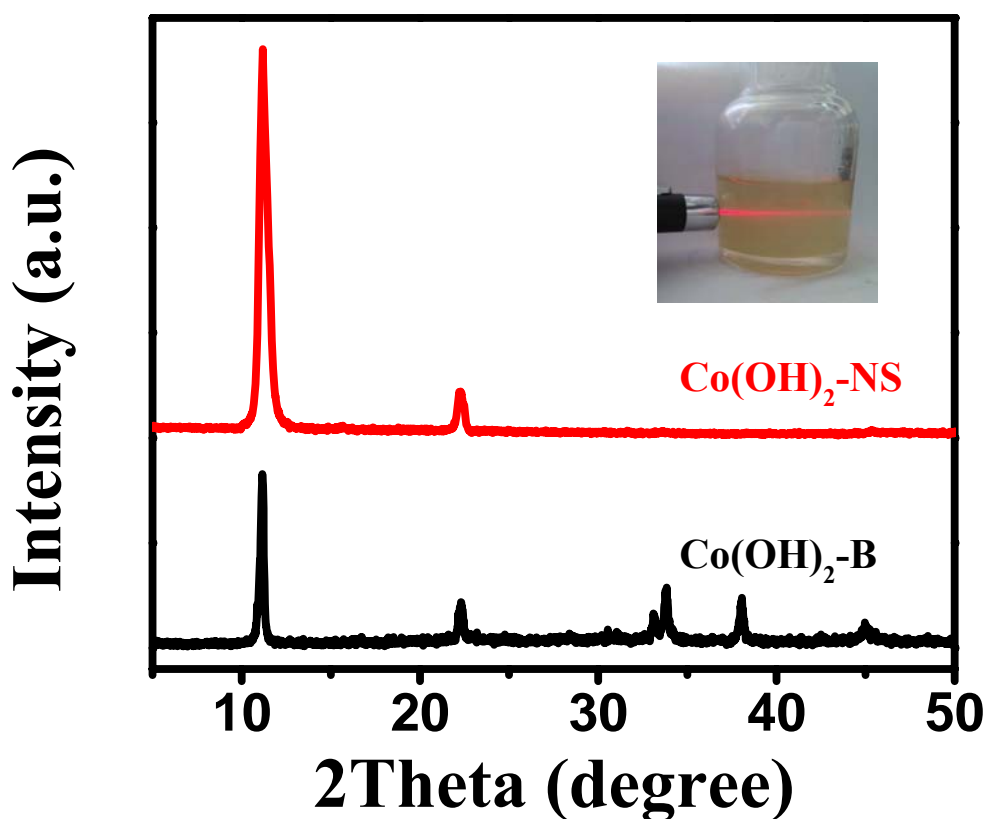

**Figure S1.** XRD pattern of Co(OH)<sub>2</sub>-NS and Co(OH)<sub>2</sub>-B. Inset shows the photograph of the corresponding colloidal dispersion that display the Tyndall effect.

As well known, it is infeasible to perform X-ray diffraction pattern (XRD) characterization on an individual nanosheet. Therefore, XRD pattern was recorded for an ultrathin nanosheet-based film which was fabricated by a layer-by-layer assembly strategy. As shown in Figure S1, the ultrathin Co(OH)<sub>2</sub>-nanosheet-based film displayed a highly preferred (001) orientation without any desirable impurity peak. The clear Tyndall light scattering is discerned for the colloidal suspension, which reasonably indicates a large amount of Co(OH)<sub>2</sub> nanosheets dispersed in solution. All diffraction peaks of bulk-phase in this pattern can be indexed to  $\alpha$ -Co(OH)<sub>2</sub>, as reported in ref. <sup>1</sup>

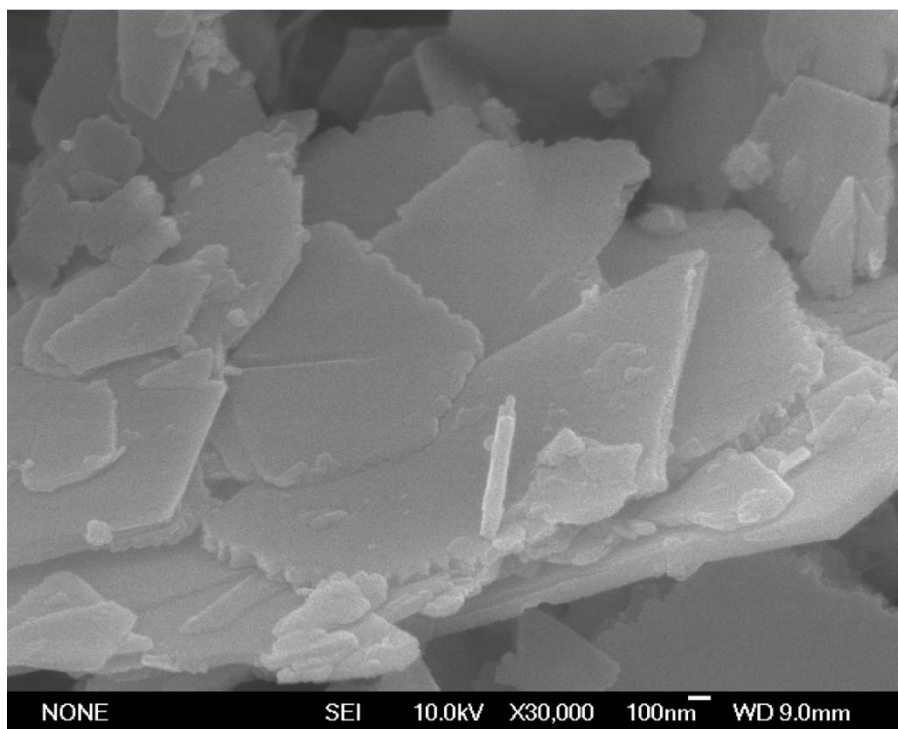

**Figure S2.** High magnification SEM image of the as-obtained  $\text{Co(OH)}_2\text{-B}$ .

Typical SEM images shown in Figure S2 reveal that  $\text{Co(OH)}_2\text{-B}$  displayed a plate-like morphology, consistent with those previously reported. The width of sheets was in the ranges of 2-3  $\mu\text{m}$ , and the thickness of plates was about 50-60 nm.

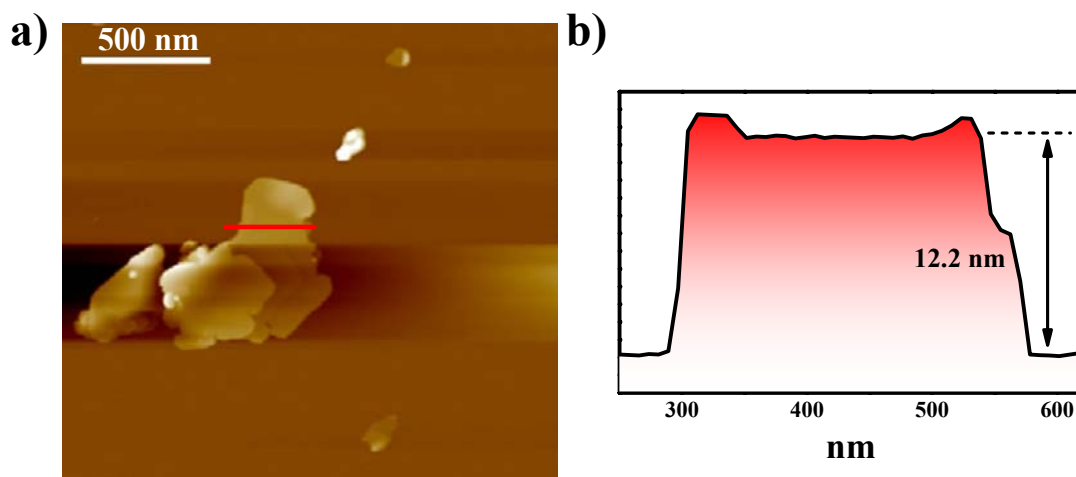

**Figure S3.** (a) and (b): Tapping mode AFM image and the corresponding height profile of the as-obtained  $\alpha$ -Co(OH)<sub>2</sub> nanosheets deposited on a mica substrate. The height profile was corresponding to the height of nanosheets. The bar in (a) is 500 nm.

AFM image shows that the thickness of Co(OH)<sub>2</sub>-NS was about 12.2 nm (about 5 Co layers), which provides a direct evidence for the successful exfoliation of Co(OH)<sub>2</sub>-B. Moreover, the number of Co(OH)<sub>2</sub> layers was corresponding to the LiCoO<sub>2</sub>-NS layers.

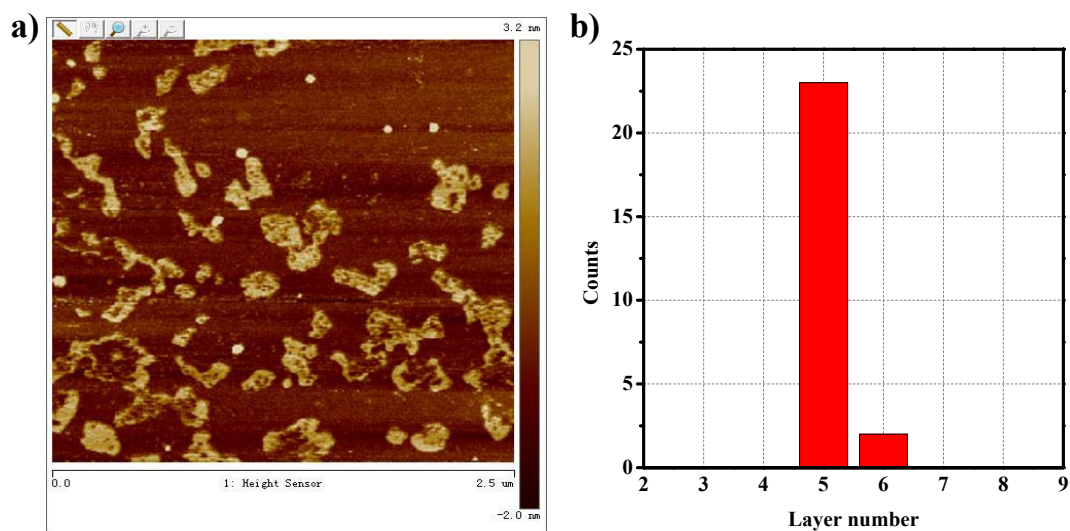

**Figure S4.** a) Tapping mode AFM image of LiCoO<sub>2</sub>-NS, b) the thickness distribution of LiCoO<sub>2</sub> nanosheets.

All thickness of LiCoO<sub>2</sub> nanosheets in Figure S4 is distributed in a range, 2.2-2.8 nm. Taking into the consideration that one Co-O layer thickness is about 0.46 nm, we can infer that the thickness LiCoO<sub>2</sub> nanosheets we obtained is about five to six layers of Co-O layers.

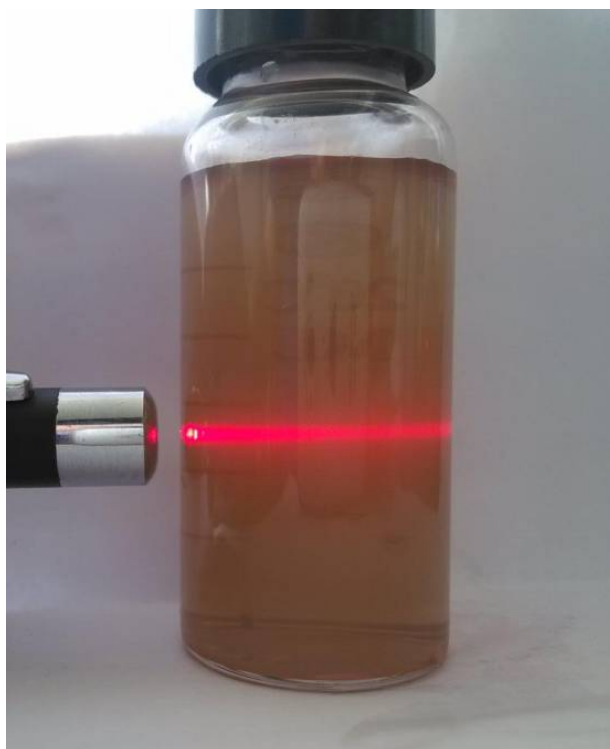

**Figure S5.** Photograph of a colloidal suspension of the  $\text{LiCoO}_2\text{-NS}$  displaying the Tyndall effect.

The well-defined Tyndall effect of the  $\text{LiCoO}_2\text{-NS}$  solution as displayed in the inset of Figure S5 indicates the presence of highly monodispersed ultrathin nanosheets in water.

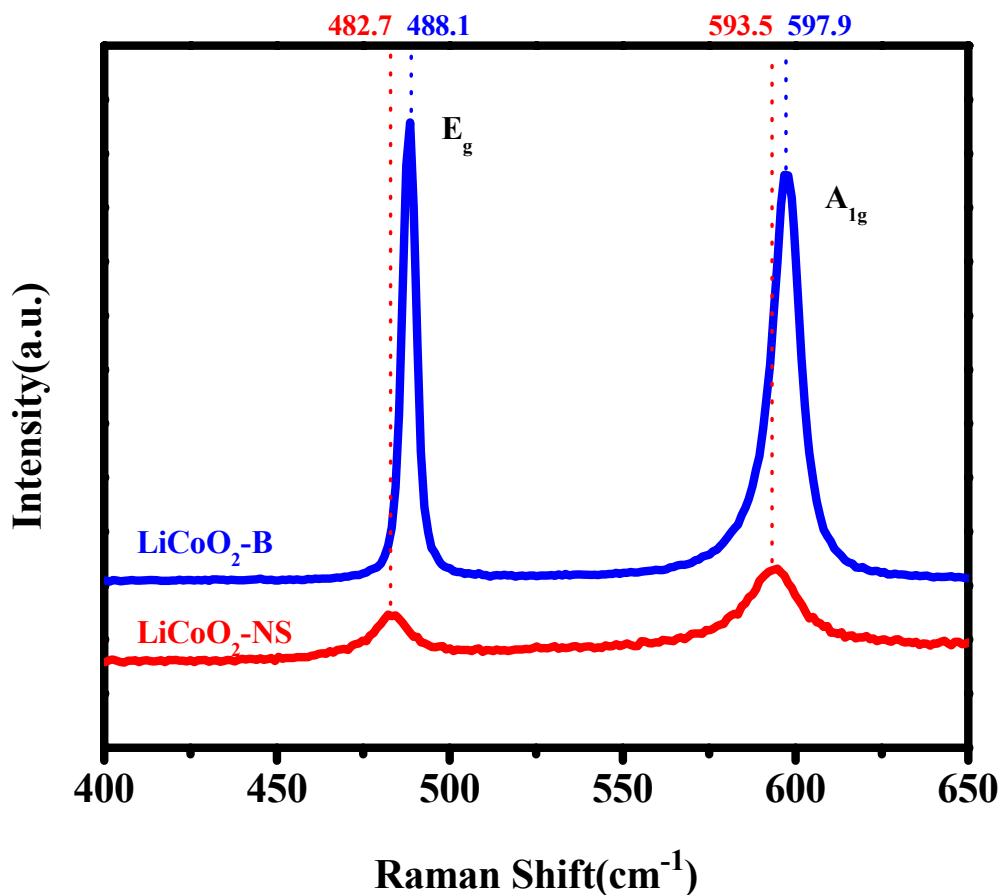

**Figure S6.** Raman spectra for LiCoO<sub>2</sub>-NS and LiCoO<sub>2</sub>-B.

For the layered structure, these are the  $A_{1g}+E_g+2A_{2u}+2E_u$ , among which  $A_{1g}$  and  $E_g$  bands are Raman-active. Two active Raman bands of the layered structure, at 593.7 and 483.2  $\text{cm}^{-1}$ , correspond to  $A_{1g}$  and  $E_g$ .<sup>2</sup> Obviously, when compared to the bulk counterpart, the Raman bands shifted towards the lower wavenumbers, which could be ascribed to the phonon confinement effect associated with the ultrathin thickness feature.

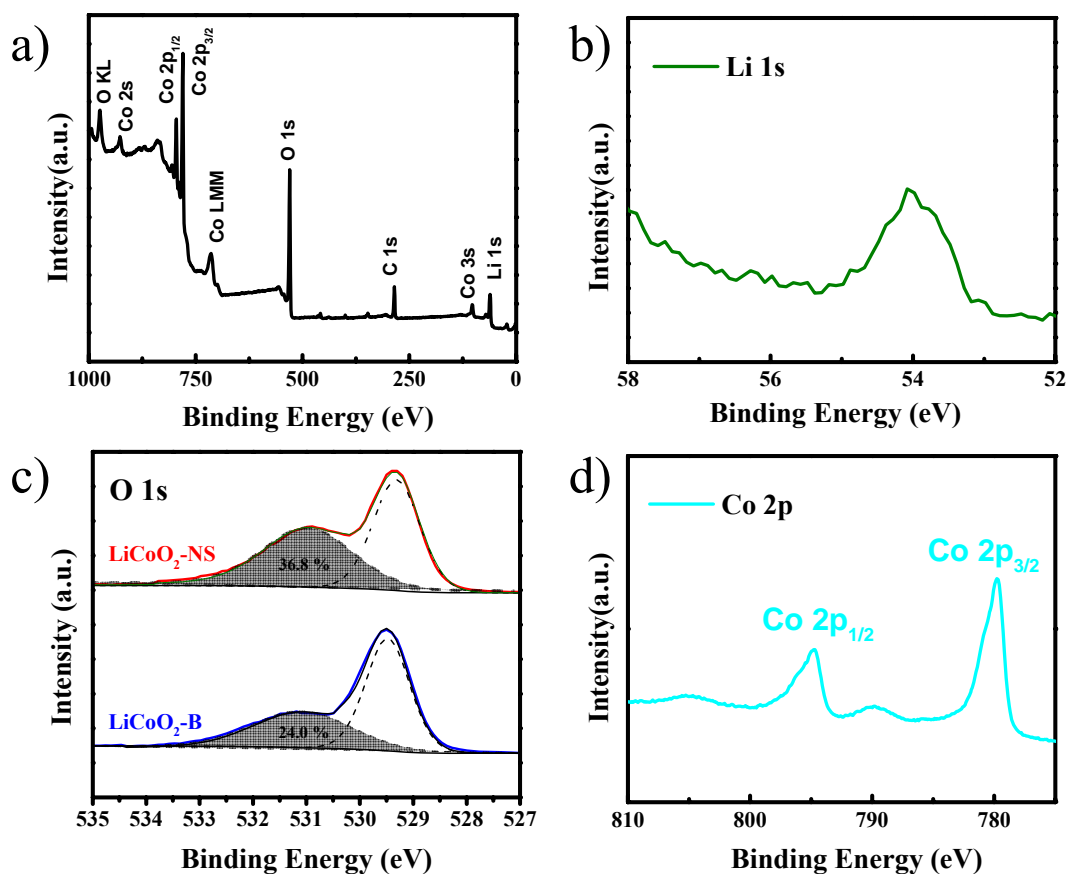

**Figure S7.** XPS spectra of LiCoO<sub>2</sub>-NS: (a) XPS survey of various elements; (b) high resolution Li 1s XPS spectra, (c) high resolution O 1s XPS spectra, and (d) high resolution Co 2p XPS spectra.

O 1s core level spectra can be deconvoluted into two peaks: one at 529.4 eV is ascribed to the oxygen atoms bound to metals, while another at 531.0 eV is attributed to the surface oxygen species such as hydroxyls that might be absorbed at oxygen vacancy site. In addition, full width at half maximum (FWHM) of Co 2p<sub>3/2</sub> peak in LiCoO<sub>2</sub>-NS is 2.25 eV, which is broadened when comparing to 1.95 eV for bulk LiCoO<sub>2</sub>.<sup>3</sup> These facts observed suggest that Co ions in LiCoO<sub>2</sub>-NS should be in a mixed valence state. The valence and electronic state of LiCoO<sub>2</sub>-NS were further demonstrated by temperature-dependent magnetic susceptibilities.



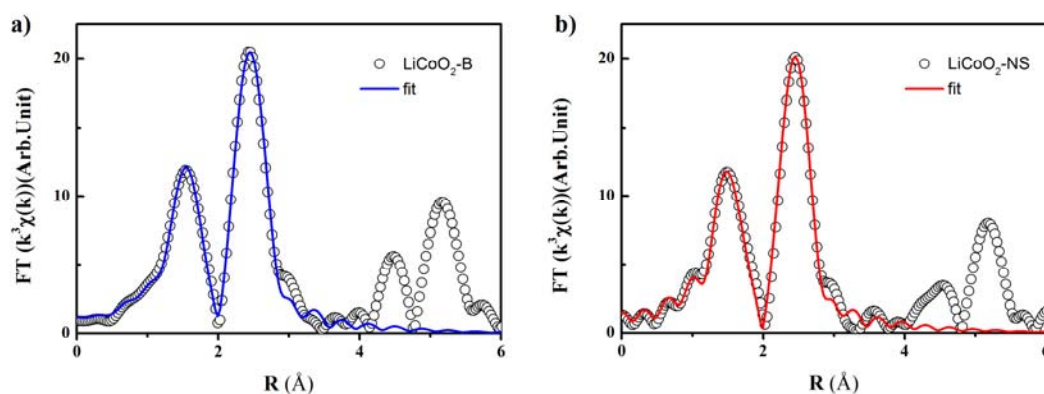

**Figure S8.** EXAFS curves-fitting result of the sample: (a) bulk and (b) nanosheet LiCoO<sub>2</sub>.

**Table S1.** Structural parameters around Co atoms determined by fitting EXAFS data for LiCoO<sub>2</sub>-B and LiCoO<sub>2</sub>-NS.

| Sample             | Path  | N   | R (Å) | $\sigma^2(10^{-3}\text{\AA}^2)$ | $\Delta E_0$ (eV) |
|--------------------|-------|-----|-------|---------------------------------|-------------------|
| LiCoO <sub>2</sub> | Co-O  | 6.0 | 1.94  | -                               | -                 |
| Theory             | Co-Co | 6.0 | 2.86  | -                               | -                 |
| LiCoO <sub>2</sub> | Co-O  | 6.0 | 1.92  | 2.9                             | -3.2              |
| Bulk               | Co-Co | 6.0 | 2.82  | 2.7                             | -6.1              |
| LiCoO <sub>2</sub> | Co-O  | 5.8 | 1.90  | 3.1                             | -4.0              |
| Nanosheets         | Co-Co | 5.8 | 2.81  | 3.0                             | -8.2              |

To compare the bonding length and coordination number of the nearest Co-O and next nearest Co-Co for LiCoO<sub>2</sub>-B and LiCoO<sub>2</sub>-NS, their EXAFS data were processed according to the standard procedures using ATHENA and ARTEMIS module implemented in the IFEFFIT software packages. The obtained data are listed in Table S1, which include the coordination number (N) of Co ion, average bonding length (R), Debye-Waller factor ( $\sigma^2$ ) and edge-energy shift ( $\Delta E_0$ ). The distances and coordination number of LiCoO<sub>2</sub>-NS reduced remarkably, when comparing to the theoretical value as well as that of LiCoO<sub>2</sub>-B, suggesting an increase of disorder due to surface distortion.

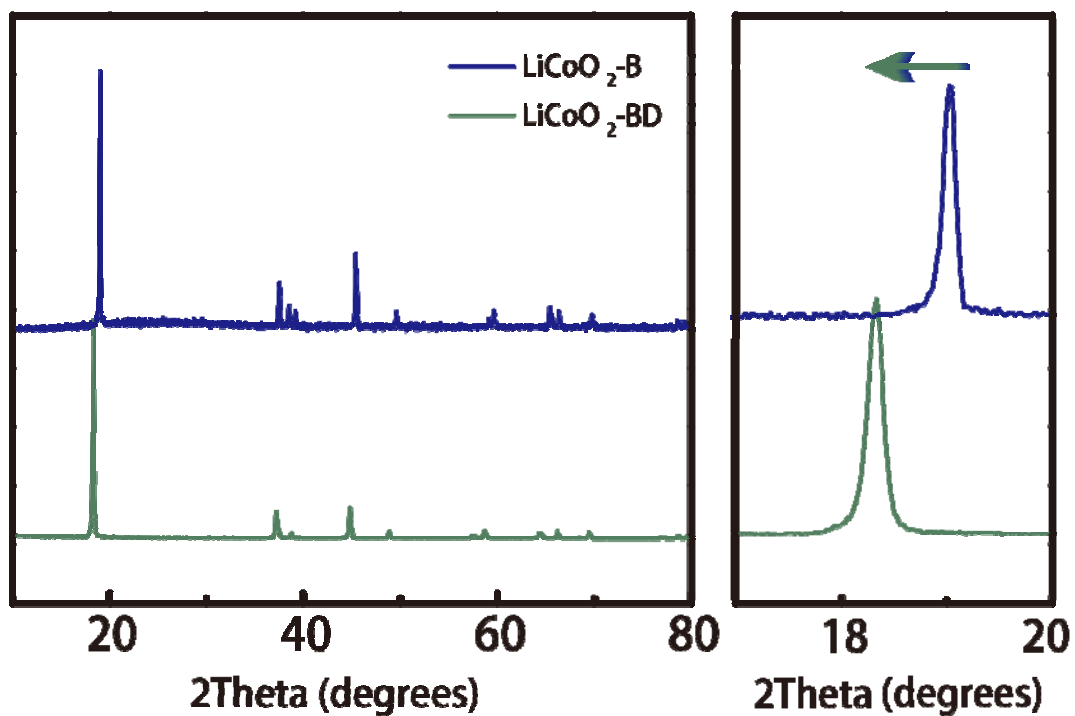

**Figure S9.** Powder XRD patterns of  $\text{LiCoO}_2\text{-B}$  and  $\text{LiCoO}_2\text{-BD}$ .

(003) peak disappeared at  $2\theta=19.0^\circ$ , while a new peak appeared at  $18.4^\circ$ , which are the most obvious changes before and after delithiation. This result is in line with the results reported in literature.<sup>4</sup>

**Table S2.** OER performances of the samples relative to those of other typical samples reported in literature

| <b>catalyst</b>                                                              | <b>Loading<br/>(mg cm<sup>-2</sup>)</b> | <b>electrolytes</b> | <b>Onset<br/>overpotential<br/>(mV)</b> | <b>Overpotential<br/>@10 mA cm<sup>-2</sup><br/>(mV)</b> |
|------------------------------------------------------------------------------|-----------------------------------------|---------------------|-----------------------------------------|----------------------------------------------------------|
| <b>LiCoO<sub>2</sub>-NS*</b>                                                 | 0.10                                    | 0.1M KOH            | 300                                     | 410                                                      |
| <b>LiCoO<sub>2</sub>-BD*</b>                                                 | 0.10                                    | 0.1M KOH            | 360                                     | 510                                                      |
| <b>LiCoO<sub>2</sub>-B*</b>                                                  | 0.10                                    | 0.1M KOH            | 400                                     | —                                                        |
| <b>LT-LiCoO<sub>2</sub><sup>5</sup></b>                                      | 0.25                                    | 0.1M KOH            | 330                                     | 470                                                      |
| <b>Fe-Co<sub>3</sub>O<sub>4</sub><sup>6</sup></b>                            | 0.12                                    | 0.1M KOH            | 349                                     | 486                                                      |
| <b>Co<sub>3</sub>O<sub>4</sub>-CuCo<sub>2</sub>O<sub>4</sub><sup>7</sup></b> | 0.12                                    | 0.1M KOH            | 321                                     | 498                                                      |
| <b>Zn-Co-LDH/CNT<sup>8</sup></b>                                             | 0.28                                    | 0.1M KOH            | 340                                     | 548                                                      |
| <b>Zn-Co-LDH<br/>nanosheets<sup>9</sup></b>                                  | 0.21                                    | 0.1M KOH            | 230                                     | 480                                                      |
| <b>Mn<sub>3</sub>O<sub>4</sub>/CoSe<sub>2</sub><sup>10</sup></b>             | 0.20                                    | 0.1M KOH            | —                                       | 450                                                      |
| <b>Pt-LiCoO<sub>2</sub><sup>11</sup></b>                                     | 0.07                                    | 0.1M KOH            | 340                                     | 440                                                      |
| <b>CoO/CNT<sup>12</sup></b>                                                  | 0.15                                    | 0.1M KOH            | 320                                     | 390-450                                                  |
| <b>Co<sub>3</sub>O<sub>4</sub>/Ni foam<sup>13</sup></b>                      | 1.00                                    | 1.0M KOH            | —                                       | 320-380                                                  |
| <b>Co<sub>3</sub>O<sub>4</sub>/C<sup>14</sup></b>                            | 0.20                                    | 1.0M KOH            | 240                                     | 290                                                      |
| <b>Porous Co<sub>3</sub>O<sub>4</sub><sup>15</sup></b>                       | 0.10                                    | 0.1M KOH            | —                                       | 410-450                                                  |

## Notes and references

- (1) Liu, Z.; Ma, R.; Osada, M.; Takada, K.; Sasaki, T. Selective and Controlled Synthesis of  $\alpha$ - and  $\beta$ -Cobalt Hydroxides in Highly Developed Hexagonal Platelets. *J. Am. Chem. Soc.* **2005**, *127* (40), 13869–13874.
- (2) Okubo, M.; Hosono, E.; Kim, J.; Enomoto, M.; Kojima, N.; Kudo, T.; Zhou, H.; Honma, I. Nanosize Effect on High-Rate Li-Ion Intercalation in  $\text{LiCoO}_2$  Electrode. *J. Am. Chem. Soc.* **2007**, *129* (23), 7444–7452.
- (3) Yu, C.; Guan, X.; Li, G.; Zheng, J.; Li, L. A Novel Approach to Composite Electrode  $0.3\text{Li}_2\text{MnO}_3\text{--}0.7\text{LiMn}_{1/3}\text{Ni}_{1/3}\text{Co}_{1/3}\text{O}_2$  in Lithium-Ion Batteries with an Anomalous Capacity and Cycling Stability at 45.4°C. *Scr. Mater.* **2012**, *66* (5), 300–303.
- (4) Lu, Z.; Wang, H.; Kong, D.; Yan, K.; Hsu, P.-C.; Zheng, G.; Yao, H.; Liang, Z.; Sun, X.; Cui, Y. Electrochemical Tuning of Layered Lithium Transition Metal Oxides for Improvement of Oxygen Evolution Reaction. *Nat. Commun.* **2014**, *5*, 4345–4351.
- (5) Maiyalagan, T.; Jarvis, K. A.; Therese, S.; Ferreira, P. J.; Manthiram, A. Spinel-Type Lithium Cobalt Oxide as a Bifunctional Electrocatalyst for the Oxygen Evolution and Oxygen Reduction Reactions. *Nat. Commun.* **2014**, *5*, 3949–3956.
- (6) Grewe, T.; Deng, X.; Tüysüz, H. Influence of Fe Doping on Structure and Water Oxidation Activity of Nanocast  $\text{Co}_3\text{O}_4$ . *Chem. Mater.* **2014**, *26* (10), 3162–3168.
- (7) Grewe, T.; Deng, X.; Weidenthaler, C.; Schüth, F.; Tüysüz, H. Design of Ordered Mesoporous Composite Materials and Their Electrocatalytic Activities for Water Oxidation. *Chem. Mater.* **2013**, *25* (24), 4926–4935.
- (8) Zou, X.; Goswami, A.; Asefa, T. Efficient Noble Metal-Free (Electro)Catalysis of Water and Alcohol Oxidations by Zinc–Cobalt Layered Double Hydroxide. *J. Am. Chem. Soc.* **2013**, *135* (46), 17242–17245.
- (9) Qiao, C.; Zhang, Y.; Zhu, Y.; Cao, C.; Bao, X.; Xu, J. One-Step Synthesis of Zinc–cobalt Layered Double Hydroxide (Zn–Co-LDH) Nanosheets for High-Efficiency Oxygen Evolution Reaction. *J Mater Chem A* **2015**, *3* (13), 6878–6883.
- (10) Gao, M.-R.; Xu, Y.-F.; Jiang, J.; Zheng, Y.-R.; Yu, S.-H. Water Oxidation Electrocatalyzed by an Efficient  $\text{Mn}_3\text{O}_4/\text{CoSe}_2$  Nanocomposite. *J. Am. Chem. Soc.* **2012**, *134* (6), 2930–2933.
- (11) Su, C.; Yang, T.; Zhou, W.; Wang, W.; Xu, X.; Shao, Z. Pt/C– $\text{LiCoO}_2$  Composites with Ultralow Pt Loadings as Synergistic Bifunctional Electrocatalysts for Oxygen Reduction and Evolution Reactions. *J Mater Chem A* **2016**, *4* (12), 4516–4524.
- (12) Seo, B.; Sa, Y. J.; Woo, J.; Kwon, K.; Park, J.; Shin, T. J.; Jeong, H. Y.; Joo, S. H. Size-Dependent Activity Trends Combined with in Situ X-Ray Absorption Spectroscopy Reveal Insights into Cobalt Oxide/Carbon Nanotube-Catalyzed Bifunctional Oxygen Electrocatalysis. *ACS Catal.* **2016**, *6* (7), 4347–4355.
- (13) Esswein, A. J.; McMurdo, M. J.; Ross, P. N.; Bell, A. T.; Tilley, T. D. Size-Dependent Activity of  $\text{Co}_3\text{O}_4$  Nanoparticle Anodes for Alkaline Water Electrolysis. *J. Phys. Chem. C* **2009**, *113* (33), 15068–15072.
- (14) Ma, T. Y.; Dai, S.; Jaroniec, M.; Qiao, S. Z. Metal–Organic Framework Derived Hybrid  $\text{Co}_3\text{O}_4$ -Carbon Porous Nanowire Arrays as Reversible Oxygen Evolution Electrodes. *J. Am. Chem. Soc.* **2014**, *136* (39), 13925–13931.
- (15) Jin Sa, Y.; Kwon, K.; Yeong Cheon, J.; Kleitz, F.; Hoon Joo, S. Ordered Mesoporous  $\text{Co}_3\text{O}_4$  Spinel as Stable, Bifunctional, Noble Metal-Free Oxygen Electrocatalysts. *J. Mater. Chem. A* **2013**, *1* (34), 9992–10001.
